# Supplementary material for: FGFR3, as a receptor tyrosine kinase, is associated with differentiated biological functions and improved survival of glioma patients
Source: PubMed Central journal article supplement (PMC5356683; doi:10.18632/oncotarget.13139), 2016-11-05
Supplement: oncotarget-07-84587-s001.pdf [file oncotarget-07-84587-s001.pdf]

# FGFR3, as a receptor tyrosine kinase, is associated with differentiated biological functions and improved s-survival of glioma patients

## Supplementary Materials

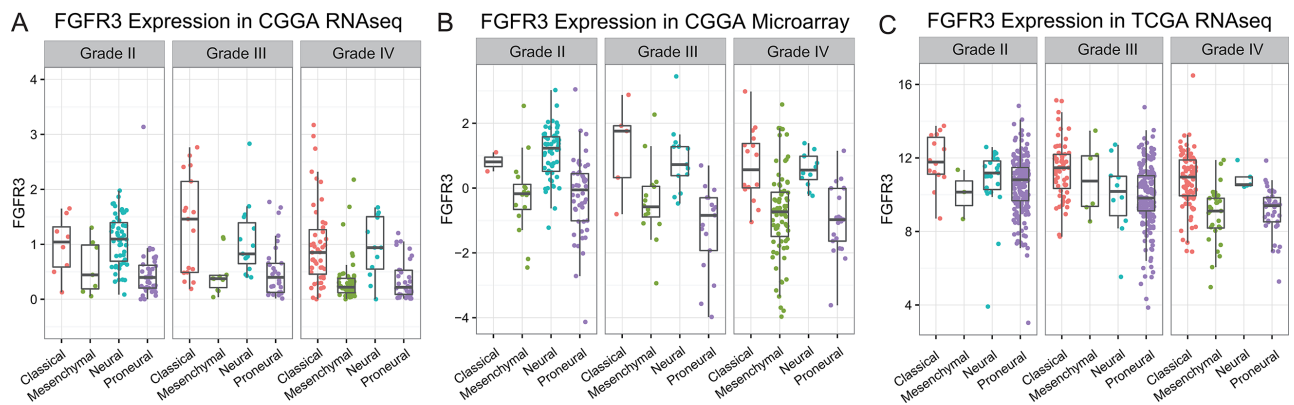

Supplementary Figure S1: FGFR3 expression across subtypes in different WHO grades.

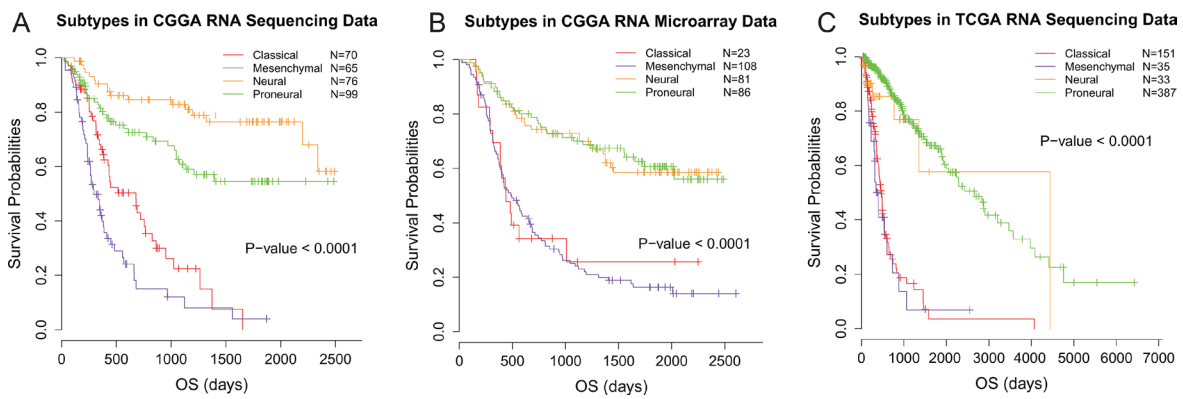

**Supplementary Figure S2: Survival analysis of FGFR3 expression between molecular subtypes.**

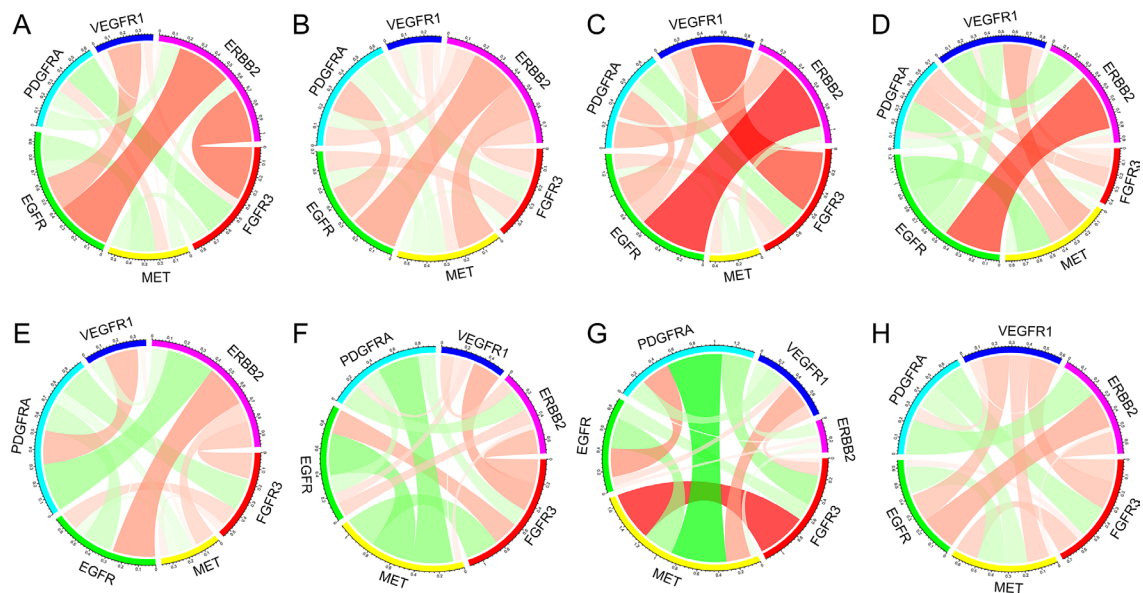

**Supplementary Figure S3: Association between FGFR3 and other RTKs in different molecular subtypes.** Red ribbons indicate positive correlation of two terms while green ribbons indicate negative correlation. Width of ribbon and scale of colors indicate Correlation coefficient.
